# Supplementary material for: Between Perfectly Critical and Fully Irregular: A Reverberating Model Captures and Predicts Cortical Spike Propagation
Source: PubMed Central journal article supplement (PMC6519697; doi:10.1093/cercor/bhz049), 2019-03-11
Supplement: bhz049_si.pdf [file bhz049_si.pdf]

609 **Supplementary material for “Between perfectly critical and fully**  
610 **irregular: a reverberating model captures and predicts cortical**  
611 **spike propagation” by J. Wilting and V. Priesemann**

612 **Supp. 1 Experiments**

613 We evaluated spike population dynamics from recordings in rats, cats and monkeys. The rat  
614 experimental protocols were approved by the Institutional Animal Care and Use Committee of  
615 Rutgers University (Mizuseki et al., 2009a,b). The cat experiments were performed in accor-  
616 dance with guidelines established by the Canadian Council for Animal Care (Blanche, 2009).  
617 The monkey experiments were performed according to the German Law for the Protection of  
618 Experimental Animals, and were approved by the Regierungspräsidium Darmstadt. The proce-  
619 dures also conformed to the regulations issued by the NIH and the Society for Neuroscience.  
620 The spike recordings from the rats and the cats were obtained from the NSF-founded CRCNS  
621 data sharing website (Blanche and Swindale, 2006, Blanche, 2009, Mizuseki et al., 2009a,b).

622 **Rat experiments.** In rats the spikes were recorded in CA1 of the right dorsal hippocampus  
623 during an open field task. We used the first two data sets of each recording group (ec013.527,  
624 ec013.528, ec014.277, ec014.333, ec015.041, ec015.047, ec016.397, ec016.430). The data-sets pro-  
625 vided sorted spikes from 4 shanks (ec013) or 8 shanks (ec014, ec015, ec016), with 31 (ec013), 64  
626 (ec014, ec015) or 55 (ec016) channels. We used both, spikes of single and multi units, because  
627 knowledge about the identity and the precise number of neurons is not required for the MR  
628 estimator. More details on the experimental procedure and the data-sets proper can be found  
629 in Mizuseki et al. (2009a,b).

630 **Cat experiments.** Spikes in cat visual cortex were recorded by Tim Blanche in the laboratory  
631 of Nicholas Swindale, University of British Columbia (Blanche, 2009). We used the data set pvc3,  
632 i.e. recordings of 50 sorted single units in area 18 (Blanche and Swindale, 2006). We used that  
633 part of the experiment in which no stimuli were presented, i.e., the spikes reflected spontaneous  
634 activity in the visual cortex of the anesthetized cat. Because of potential non-stationarities at  
635 the beginning and end of the recording, we omitted data before 25 s and after 320 s of recording.  
636 Details on the experimental procedures and the data proper can be found in Blanche (2009),  
637 Blanche and Swindale (2006).

638 **Monkey experiments.** The monkey data are the same as in Pipa et al. (2009), Priesemann  
639 et al. (2014). In these experiments, spikes were recorded simultaneously from up to 16 single-  
640 ended micro-electrodes ( $\varnothing = 80 \mu\text{m}$ ) or tetrodes ( $\varnothing = 96 \mu\text{m}$ ) in lateral prefrontal cortex of  
641 three trained macaque monkeys (M1: 6 kg ♀; M2: 12 kg ♂; M3: 8 kg ♀). The electrodes had  
642 impedances between 0.2 and 1.2 M $\Omega$  at 1 kHz, and were arranged in a square grid with inter  
643 electrode distances of either 0.5 or 1.0 mm. The monkeys performed a visual short term memory  
644 task. The task and the experimental procedure is detailed in Pipa et al. (2009). We analyzed  
645 spike data from 12 experimental sessions comprising almost 12.000 trials (M1: 5 sessions; M2: 4  
646 sessions; M3: 3 sessions). 6 out of 12 sessions were recorded with tetrodes. Spike sorting on the  
647 tetrode data was performed using a Bayesian optimal template matching approach as described  
648 in Franke et al. (2010) using the “Spyke Viewer” software (Pröpper and Obermayer, 2013). On the  
649 single electrode data, spikes were sorted with a multi-dimensional PCA method (Smart Spike  
650 Sorter by Nan-Hui Chen).

## 651 **Supp. 2 Analysis**

652 **Temporal binning.** For each recording, we collapsed the spike times of all recorded neurons  
653 into one single train of population spike counts  $a_t$ , where  $a_t$  denotes how many neurons spiked  
654 in the  $t^{\text{th}}$  time bin  $\Delta t$ . If not indicated otherwise, we used  $\Delta t = 4 \text{ ms}$ , reflecting the propagation  
655 time of spikes from one neuron to the next.

656 **Multistep regression estimation of  $\hat{m}$ .** From these time series, we estimated  $\hat{m}$  using the  
657 MR estimator described in Wilting and Priesemann (2018). For  $k = 1, \dots, k_{\text{max}}$ , we calculated  
658 the linear regression slope  $r_{k \Delta t}$  for the linear statistical dependence of  $a_{t+k}$  upon  $a_t$ . From  
659 these slopes, we estimated  $\hat{m}$  following the relation  $r_{\delta t} = b \cdot \hat{m}^{\delta t / \Delta t}$ , where  $b$  is an (unknown)  
660 parameter that depends on the higher moments of the underlying process and the degree of  
661 subsampling. However, for an estimation of  $m$  no further knowledge about  $b$  is required.

662 Throughout this study we chose  $k_{\text{max}} = 2500$  (corresponding to 10 s) for the rat record-  
663 ings,  $k_{\text{max}} = 150$  (600 ms) for the cat recording, and  $k_{\text{max}} = 500$  (2000 ms) for the monkey  
664 recordings, assuring that  $k_{\text{max}}$  was always in the order of multiple intrinsic network timescales  
665 (i.e., autocorrelation times).

666 In order to test for the applicability of a MR estimation, we used a set of conservative tests  
667 (Wilting and Priesemann, 2018), which found the expected exponential relation  $r_{\delta t} = b m^{\delta t / \Delta t}$   
668 in the majority of experimental recordings (14 out of 21, Fig. S1).

**Avalanche size distributions.** Avalanche sizes were determined similarly to the procedure described in Priesemann et al. (2009, 2014). Assuming that individual avalanches are separated in time, let  $\{t_i\}$  indicate bins without activity,  $a_{t_i} = 0$ . The size  $s_i$  of one avalanche is defined by the integrated activity between two subsequent bins with zero activity:

$$s_i = \sum_{t=t_i}^{t_{i+1}} a_t. \quad (\text{S1})$$

669 From the sample  $\{s_i\}$  of avalanche sizes, avalanche size distributions  $p(s)$  were determined  
 670 using frequency counts. For illustration, we applied logarithmic binning, i.e. exponentially in-  
 671 creasing bin widths for  $s$ .

672 For each experiments, these empirical avalanche size distributions were compared to avalanche  
 673 size distributions obtained in a similar fashion from three different matched models (see below  
 674 for details). Model likelihoods  $l(\{s_i\} | m)$  for all three models were calculated following Clauset  
 675 et al. (2009), and we considered the likelihood ratio to determine the most likely model based  
 676 on the observed data.

677 **ISI distributions, Fano factors and spike count cross-correlations.** For each experiment  
 678 and corresponding reverberating branching model (subsamped to a single unit), ISI distributions  
 679 were estimated by frequency counts of the differences between subsequent spike times for each  
 680 channel.

681 We calculated the single unit Fano factor  $F = \text{Var}[a_t] / \langle a_t \rangle$  for the binned activity  $a_t$  of  
 682 each single unit, with the bin sizes indicated in the respective figures. Likewise, single unit Fano  
 683 factors for the reverberating branching models were calculated from the subsampled and binned  
 684 time series.

685 From the binned single unit activities  $a_t^1$  and  $a_t^2$  of two units, we estimated the spike count  
 686 cross correlation  $r_{\text{sc}} = \text{Cov}(a_t^1, a_t^2) / \sigma_{a_t^1} \sigma_{a_t^2}$ . The two samples  $a_t^1$  and  $a_t^2$  for the reverberating  
 687 branching models were obtained by sampling two randomly chosen neurons.

### 688 **Supp. 3 Branching processes**

689 In a branching process (BP) with immigration (Harris, 1963, Heathcote, 1965, Pakes, 1971) each  
 690 unit  $i$  produces a random number  $y_{t,i}$  of units in the subsequent time step. Additionally, in each  
 691 time step a random number  $h_t$  of units immigrates into the system (drive). Mathematically, BPs  
 692 are defined as follows (Harris, 1963, Heathcote, 1965): Let  $y_{t,i}$  be independently and identically

693 distributed non-negative integer-valued random variables following a law  $Y$  with mean  $m =$   
694  $\langle Y \rangle$  and variance  $\sigma^2 = \text{Var}[Y]$ . Further,  $Y$  shall be non-trivial, meaning it satisfies  $\text{P}[Y = 0] >$   
695  $0$  and  $\text{P}[Y = 0] + \text{P}[Y = 1] < 1$ . Likewise, let  $h_t$  be independently and identically distributed  
696 non-negative integer-valued random variables following a law  $H$  with mean rate  $h = \langle H \rangle$  and  
697 variance  $\xi^2 = \text{Var}[H]$ . Then the evolution of the BP  $A_t$  is given recursively by

$$A_{t+1} = \sum_{i=1}^{A_t} y_{t,i} + h_t, \quad (\text{S2})$$

698 i.e. the number of units in the next generation is given by the offspring of all present units and  
699 those that were introduced to the system from outside.

700 The stability of BPs is solely governed by the mean offspring  $m$ . In the subcritical state,  $m <$   
701  $1$ , the population converges to a stationary distribution  $A_\infty$  with mean  $\langle A_\infty \rangle = h/(1 - m)$ .  
702 At criticality ( $m = 1$ ),  $A_t$  asymptotically exhibits linear growth, while in the supercritical state  
703 ( $m > 1$ ) it grows exponentially.

We will now derive results for the mean, variance, and Fano factor of subcritical branching  
processes. Following previous results, taking expectation values of both sides of Eq. (S2) yields  
 $\langle A_{t+1} \rangle = m\langle A_t \rangle + h$ . Because of stationarity  $\langle A_{t+1} \rangle = \langle A_t \rangle = \langle A_\infty \rangle$  and the mean activity  
is given by

$$\langle A_\infty \rangle = \frac{h}{1 - m}. \quad (\text{S3})$$

704 In order to derive an expression for the variance of the stationary distribution, observe that by the  
705 theorem of total variance,  $\text{Var}[A_{t+1}] = \langle \text{Var}[A_{t+1} | A_t] \rangle + \text{Var}[\langle A_{t+1} | A_t \rangle]$ , where  $\langle \cdot \rangle$  denotes  
706 the expected value, and  $A_{t+1} | A_t$  conditioning the random variable  $A_{t+1}$  on  $A_t$ . Because  $A_{t+1}$   
707 is the sum of independent random variables, the variances also sum:  $\text{Var}[A_{t+1} | A_t] = \sigma^2 A_t +$   
708  $\xi^2$ . Using the previous result for  $\langle A_\infty \rangle$  one then obtains

$$\text{Var}[A_{t+1}] = \xi^2 + \sigma^2 \frac{h}{1 - m} + \text{Var}[mA_t + h] = \xi^2 + \sigma^2 \frac{h}{1 - m} + m^2 \text{Var}[A_t].$$

709 Again, in the stationary distribution  $\text{Var}[A_{t+1}] = \text{Var}[A_t] = \text{Var}[A_\infty]$  which yields

$$\text{Var}[A_\infty] = \frac{1}{1-m^2} \left( \xi^2 + \sigma^2 \frac{h}{1-m} \right), \quad (\text{S4})$$

710 The Fano factor  $F_{A_t} = \text{Var}[A_t] / \langle A_t \rangle$  is easily computed from (S3) and (S4):

$$F_{A_t} = \frac{\xi^2}{h(1+m)} + \frac{\sigma^2}{1-m^2}. \quad (\text{S5})$$

711 Interestingly, the mean rate, variance, and Fano factor all diverge when approaching criticality  
 712 (given a constant input rate  $h$ ):  $\langle A_\infty \rangle \rightarrow \infty$ ,  $\text{Var}[A_\infty] \rightarrow \infty$ , and  $F_{A_t} \rightarrow \infty$  as  $m \rightarrow 1$ .

713 These results were derived without assuming any particular law for  $Y$  or  $H$ . Although the  
 714 limiting behavior of BPs does not depend on it (Harris, 1963, Heathcote, 1965, Pakes, 1971), fixing  
 715 particular laws allows to simplify these expressions further.

We here chose Poisson distributions with means  $m$  and  $h$  for  $Y$  and  $H$  respectively:  $y_{t,i} \sim \text{Poi}(m)$  and  $h_t \sim \text{Poi}(h)$ . We chose these laws for two reasons: (1) Poisson distributions allow for non-trivial offspring distributions with easy control of the branching ratio  $m$  by only one parameter. (2) For the brain, one might assume that each neuron is connected to  $k$  postsynaptic neurons, each of which is excited with probability  $p$ , motivating a binomial offspring distribution with mean  $m = kp$ . As in cortex  $k$  is typically large and  $p$  is typically small, the Poisson limit is a reasonable approximation. Choosing these distributions, the variance and Fano factor become

$$\begin{aligned} \text{Var}[A_t] &= h / ((1-m)^2(1+m)), \\ F_{A_t} &= 1 / (1-m^2). \end{aligned} \quad (\text{S6})$$

716 Both diverge when approaching criticality ( $m = 1$ ).

#### 717 **Supp. 4 Subsampling**

718 A general notion of subsampling was introduced in Wilting and Priesemann (2018). The sub-  
 719 sampled time series  $a_t$  is constructed from the full process  $A_t$  based on the three assumptions:  
 720 (i) The sampling process does not interfere with itself, and does not change over time. Hence  
 721 the realization of a subsample at one time does not influence the realization of a subsample at  
 722 another time, and the conditional *distribution* of  $(a_t|A_t)$  is the same as  $(a_{t'}|A_{t'})$  if  $A_t = A_{t'}$ .

723 However, even if  $A_t = A_{t'}$ , the subsampled  $a_t$  and  $a_{t'}$  do not necessarily take the same value.  
 724 (ii) The subsampling does not interfere with the evolution of  $A_t$ , i.e. the process evolves in-  
 725 dependent of the sampling. (iii) *On average*  $a_t$  is proportional to  $A_t$  up to a constant term,  
 726  $\langle a_t | A_t \rangle = \alpha A_t + \beta$ .

727 In the spike recordings analyzed in this study, the states of a subset of neurons are observed  
 728 by placing electrodes that record the activity of the same set of neurons over the entire record-  
 729 ing. This implementation of subsampling translates to the general definition in the following  
 730 manner: If  $n$  out of all  $N$  neurons are sampled, the probability to sample  $a_t$  active neurons out  
 731 of the actual  $A_t$  active neurons follows a hypergeometric distribution,  $a_t \sim \text{Hyp}(N, n, A_t)$ . As  
 732  $\langle a_t | A_t = j \rangle = j n / N$ , this representation satisfies the mathematical definition of subsam-  
 733 pling with  $\alpha = n / N$ . Choosing this special implementation of subsampling allows to derive  
 734 predictions for the Fano factor under subsampling and the spike count cross correlation. First,  
 735 evaluate  $\text{Var}[a_t]$  further in terms of  $A_t$ :

$$\begin{aligned}
 \text{Var}[a_t] &= \langle \text{Var}[a_t | A_t] \rangle + \text{Var}[\langle a_t | A_t \rangle] \\
 &= n \left\langle \frac{A_t}{N} \frac{N - A_t}{N} \frac{N - n}{N - 1} \right\rangle + \text{Var}\left[\frac{n}{N} A_t\right] \\
 &= \frac{1}{N} \frac{n}{N} \frac{N - n}{N - 1} (N \langle A_t \rangle - \langle A_t^2 \rangle) + \frac{n^2}{N^2} \text{Var}[A_t] \\
 &= \frac{n}{N^2} \frac{N - n}{N - 1} (N \langle A_t \rangle - \langle A_t \rangle^2) + \left( \frac{n^2}{N^2} - \frac{n}{N^2} \frac{N - n}{N - 1} \right) \text{Var}[A_t]. \quad (\text{S7})
 \end{aligned}$$

736 This expression precisely determines the variance  $\text{Var}[a_t]$  under subsampling from the proper-  
 737 ties  $\langle A_t \rangle$  and  $\text{Var}[A_t]$  of the full process, and from the parameters of subsampling  $n$  and  $N$ . We  
 738 now show that the Fano factor approaches and even falls below unity under strong subsampling,  
 739 regardless of the underlying dynamical state  $m$ . In the limit of strong subsampling ( $n \ll N$ ) Eq.  
 740 (S7) yields:

$$\text{Var}[a_t] \approx \frac{n}{N^2} (N \langle A_t \rangle - \langle A_t \rangle^2) + \frac{n^2 - n}{N^2} \text{Var}[A_t]. \quad (\text{S8})$$

741 Hence the subsampled Fano factor is given by

$$F_{a_t} = \frac{\text{Var}[a_t]}{\langle a_t \rangle} \approx 1 - \frac{\langle A_t \rangle}{N} + \frac{n-1}{N} \frac{\text{Var}[A_t]}{\langle A_t \rangle} = 1 - \frac{\langle A_t \rangle - (n-1)F_{A_t}}{N}. \quad (\text{S9})$$

742 Interestingly, when sampling a single unit ( $n = 1$ ) the Fano factor of that unit becomes com-  
743 pletely independent of the Fano factor of the full process:

$$F_{a_t} = 1 - \langle A_t \rangle / N = 1 - \langle a_t \rangle / n = 1 - R, \quad (\text{S10})$$

744 where  $R = \langle a_t \rangle / n$  is the mean rate of a single unit.

745 Based on this implementation of subsampling, we derived analytical results for the cross-  
746 correlation between the activity of two units on the time scale of one time step. The pair of  
747 units is here represented by two independent samplings  $a_t$  and  $\tilde{a}(t)$  of a BP  $A_t$  with  $n = 1$ ,  
748 i.e. each represents one single unit. Because both samplings are drawn from identical distri-  
749 butions, their variances are identical and hence the correlation coefficient is given by  $r_{\text{sc}} =$   
750  $\text{Cov}(a_t, \tilde{a}(t)) / \text{Var}[a_t]$ . Employing again the law of total expectation and using the indepen-  
751 dence of the two samplings, this can be evaluated:

$$\text{Cov}(a_t, \tilde{a}(t)) = \langle \langle a_t \tilde{a}(t) | A_t \rangle \rangle_{A_t} - \langle \langle a_t | A_t \rangle \rangle_{A_t}^2 = \frac{1}{N^2} \text{Var}[A_t], \quad (\text{S11})$$

with the first inner expectation being taken over the joint distribution of  $a_t$  and  $\tilde{a}(t)$ . Using Eq.  
(S8), one easily obtains

$$r_{\text{sc}} = \frac{\text{Var}[A_t]}{N \langle A_t \rangle - \langle A_t \rangle^2} = \frac{F_{A_t}}{N - \langle A_t \rangle} = \frac{F_{A_t}}{N(1 - R)} \quad (\text{S12})$$

752 with the mean single unit rate  $R = \langle A_t \rangle / N$ . For subcritical systems, the Fano factor  $F_{A_t}$   
753 is much smaller than  $N$ , and the rate is typically much smaller than 1. Therefore, the cross-  
754 correlation between single units is typically very small.

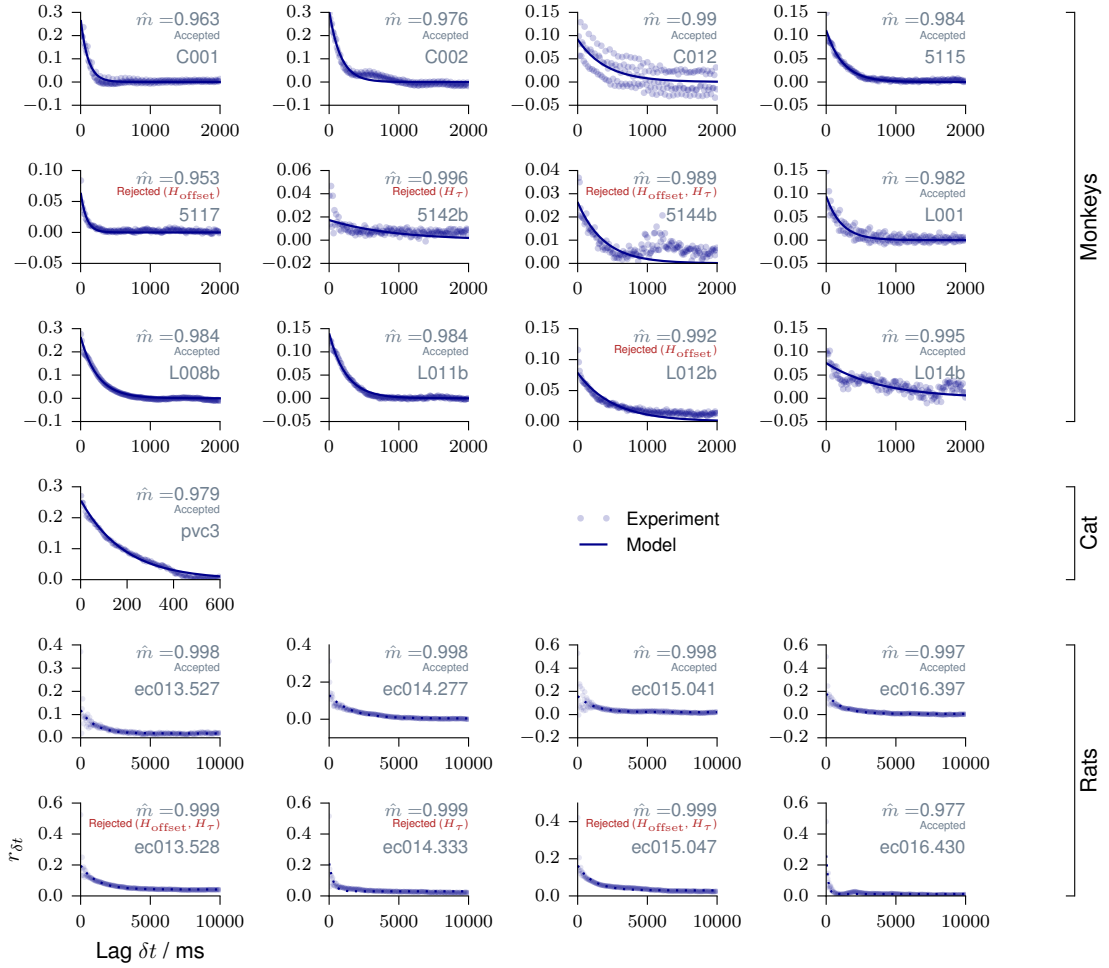

**FIGURE S1: MR estimation for individual recording sessions.** Reproduced from Wilting and Priesemann (2018). MR estimation is shown for every individual animal. The consistency checks are detailed in Wilting and Priesemann (2018). Data from monkey were recorded in prefrontal cortex during an working memory task. The third panel shows a oscillation of  $r_k$  with a frequency of 50 Hz, corresponding to measurement corruption due to power supply frequency. Data from anesthetized cat were recorded in primary visual cortex. Data from rat were recorded in hippocampus during a foraging task. In addition to a slow exponential decay, the slopes  $r_k$  show the  $\vartheta$ -oscillations of 6 – 10 Hz present in hippocampus.



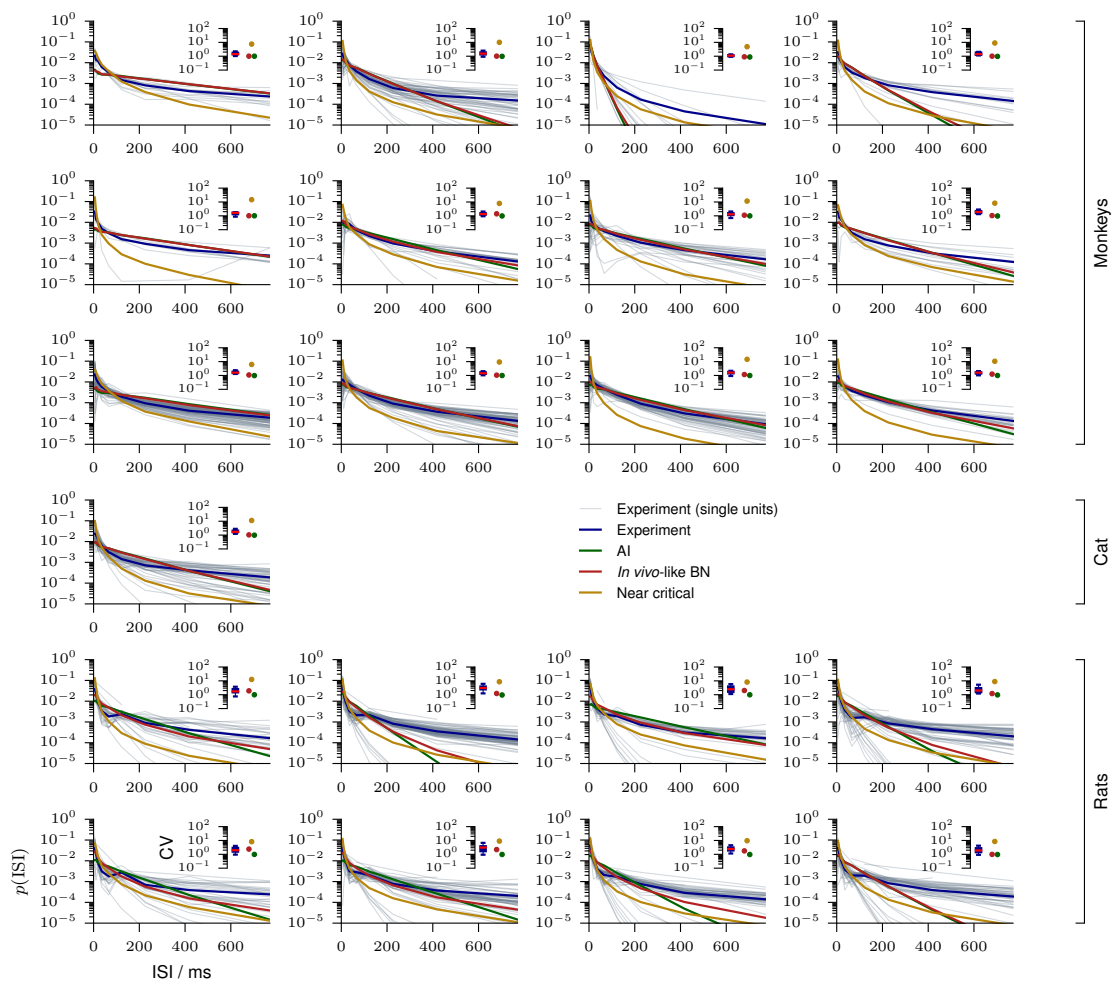

**FIGURE S2: Interspike interval distribution for individual recording sessions.** Interspike interval (ISI) distributions are shown for individual units of each recording (gray), for the average over units of each recording (blue), as well as for the matched models, either AI (green), *in vivo*-like (red), or near critical (yellow). The insets show the corresponding coefficients of variation (CV). For every experiment AI and *in vivo*-like models are virtually indistinguishable by the ISI distributions.

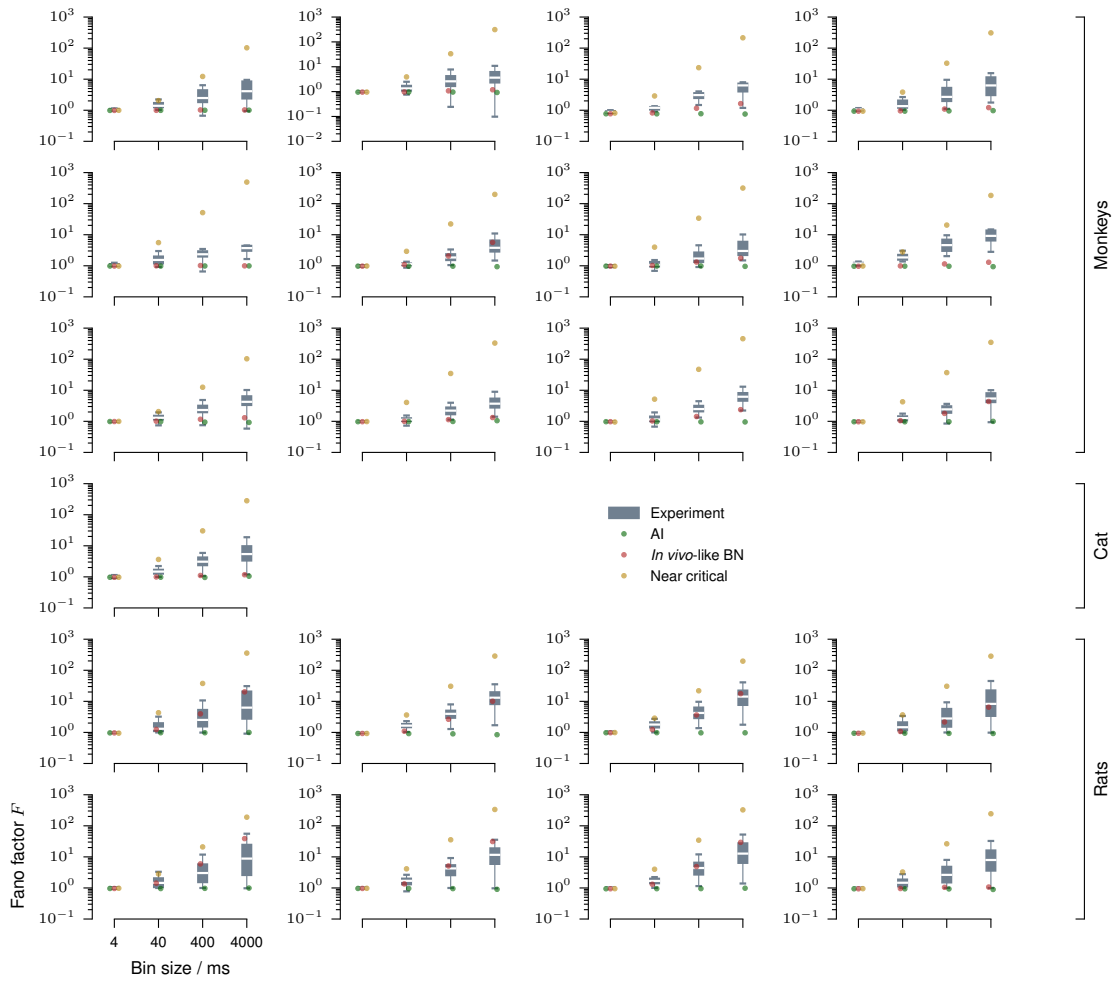

**FIGURE S3: Fano factors for individual recording sessions.** Fano factors are shown for individual single or multi units of every recording (gray boxplots, median / 25% – 75%, 2.5% – 97.5%), as well as for the matched models, either AI (green), *in vivo*-like (red), or near critical (yellow).

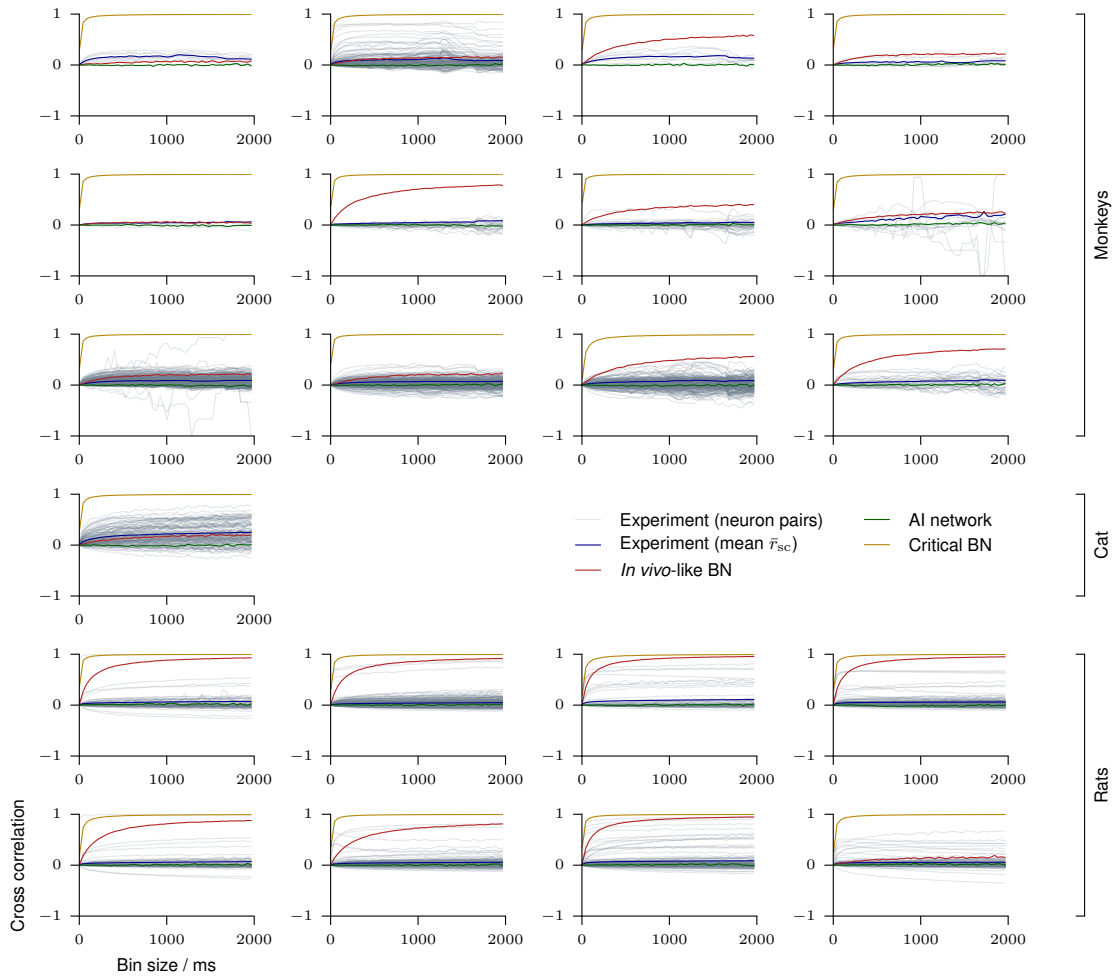

**FIGURE S4: Cross correlations for individual recording sessions.** Spike count cross correlations ( $r_{sc}$ ) are shown for every neuron pair (gray) and the ensemble average (blue) of each recording, for bin sizes from 1 ms to 2s. Cross correlations are also shown for the matched models, either AI (green), *in vivo*-like (red), or near critical (yellow).

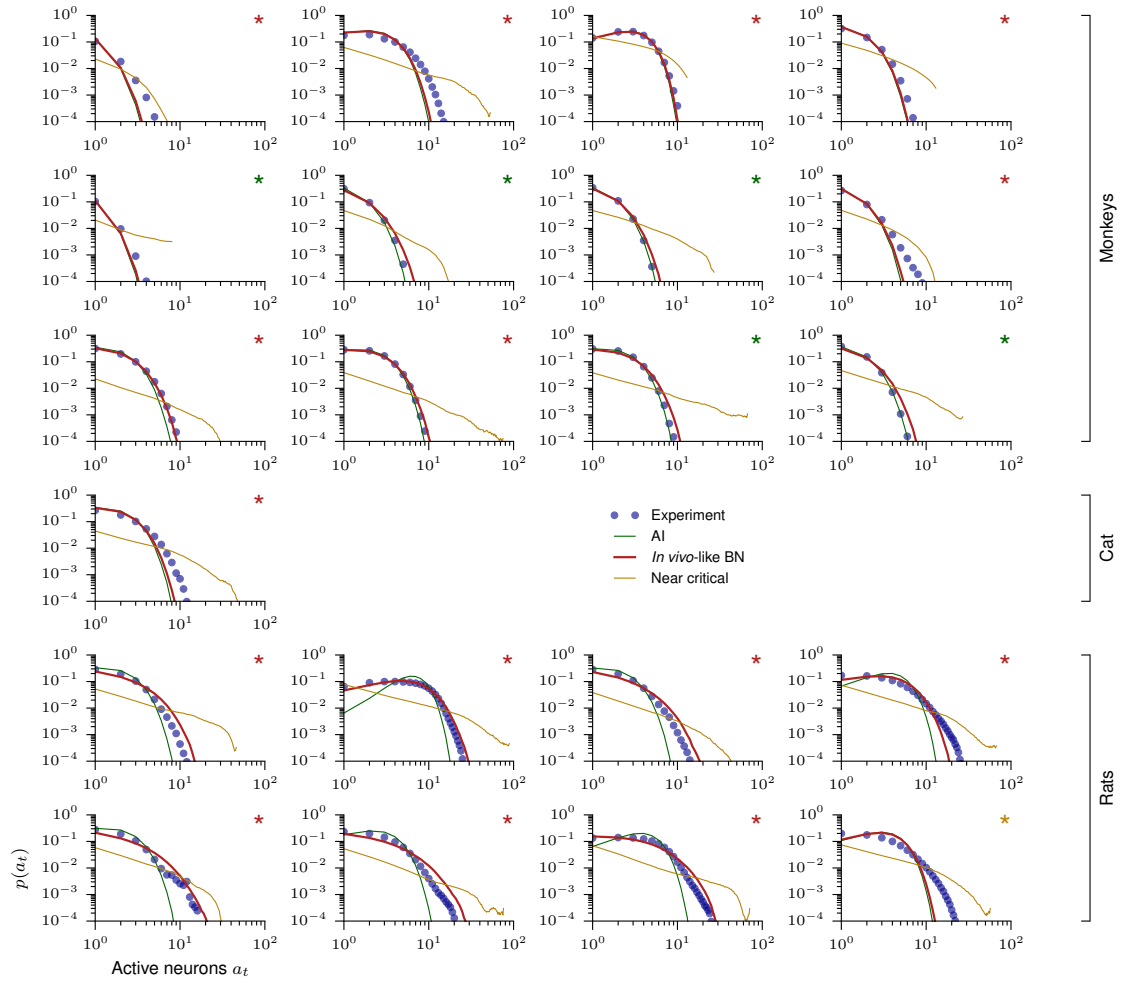

**FIGURE S5: Activity distributions (4 ms bin size).** Activity distributions are shown for every recording for a bin size of 4 ms (blue). Activity distributions for the matched models, either AI (green), *in vivo*-like (red), or near critical (yellow) are also shown. The color of the asterisk indicates which of the three models yielded the highest likelihood for the data following Clauset et al. (2009).

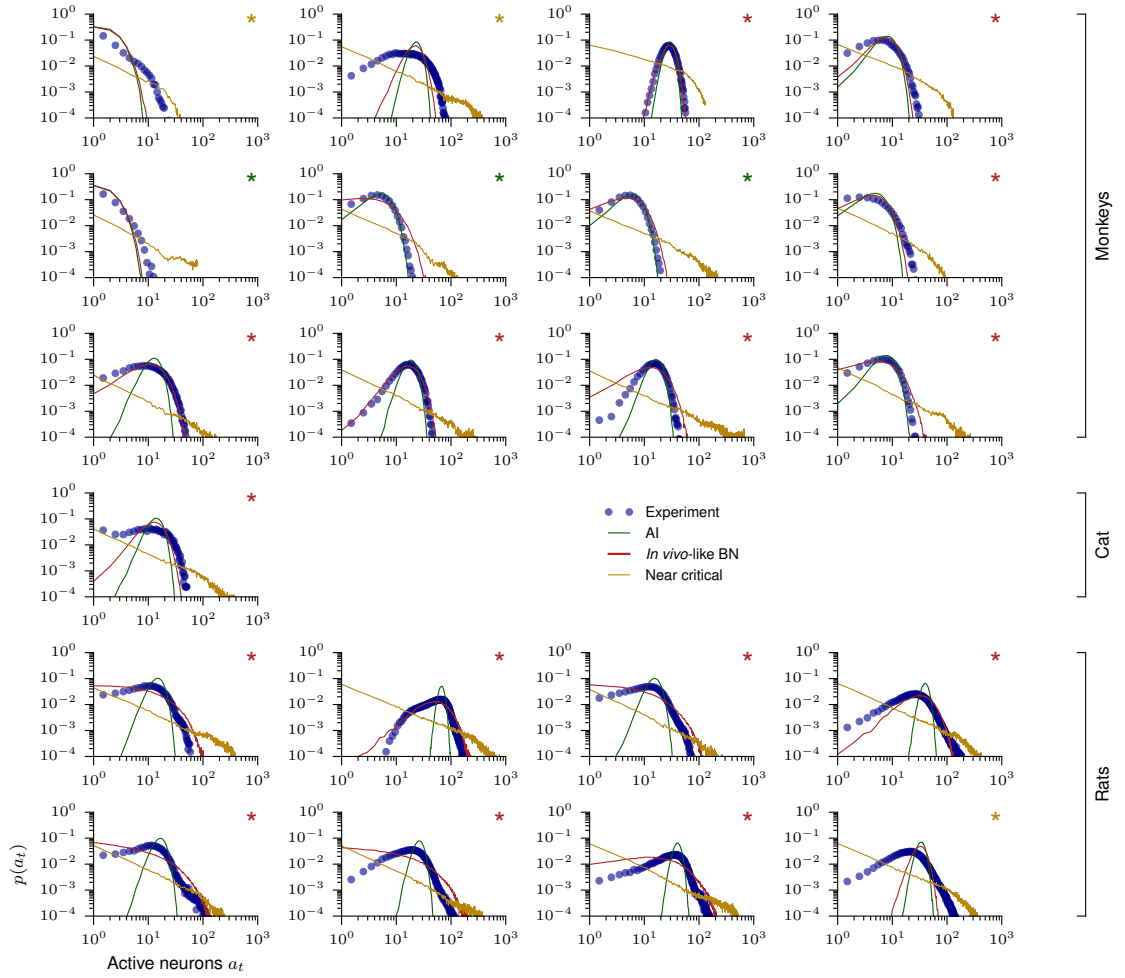

**FIGURE S6: Activity distributions (40 ms bin size).** Activity distributions are shown for every recording, for a bin size of 40 ms (blue). Activity distributions for the matched models, either AI (green), *in vivo*-like (red), or near critical (yellow) are also shown. The color of the asterisk indicates which of the three models yielded the highest likelihood for the data following Clauset et al. (2009).

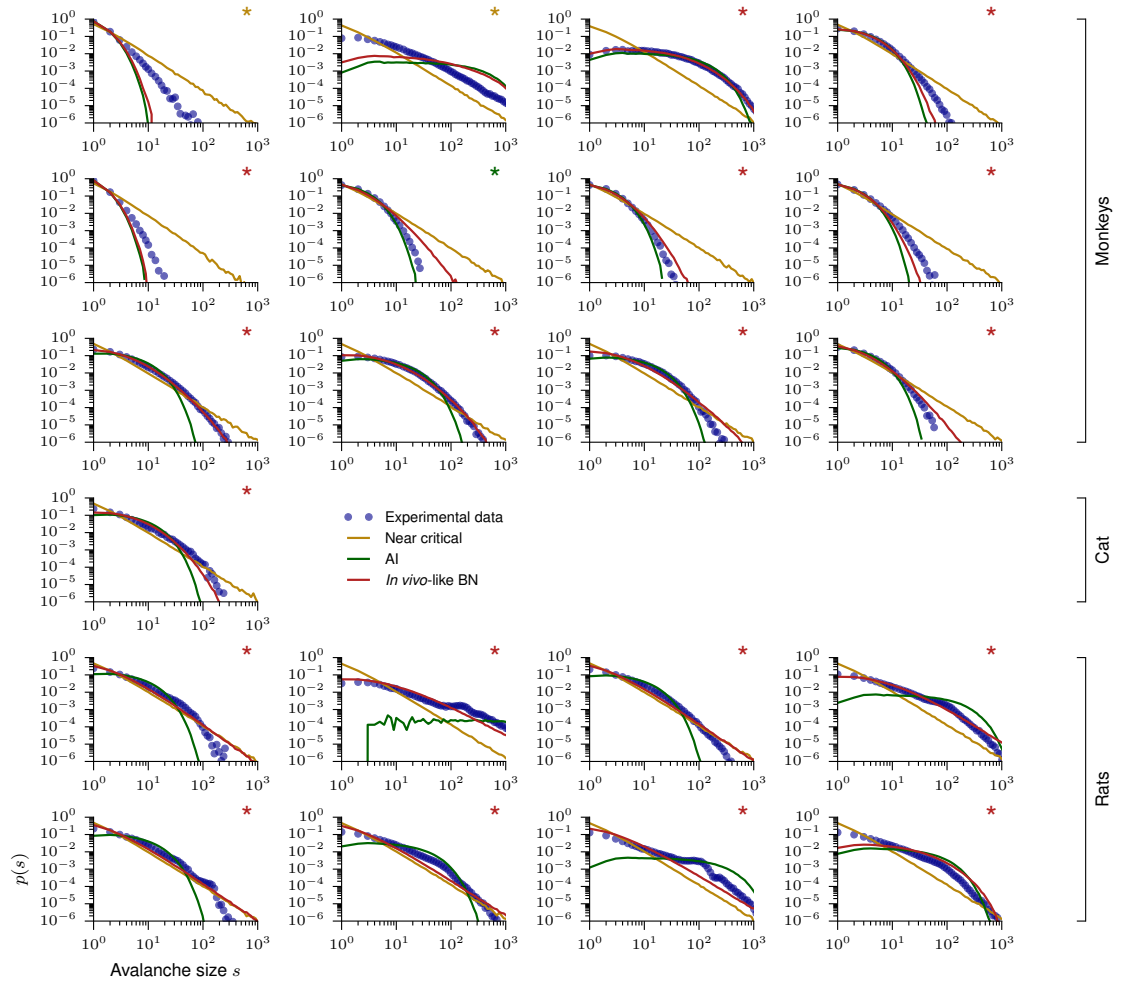

**FIGURE S7: Avalanche size distribution for individual recording sessions.** Avalanche size distributions are shown for every recording (blue) and for matched models, either AI (green), *in vivo*-like (red), or near critical (yellow). The color of the asterisk indicates which of the three models yielded the highest likelihood for the data following Clauset et al. (2009).

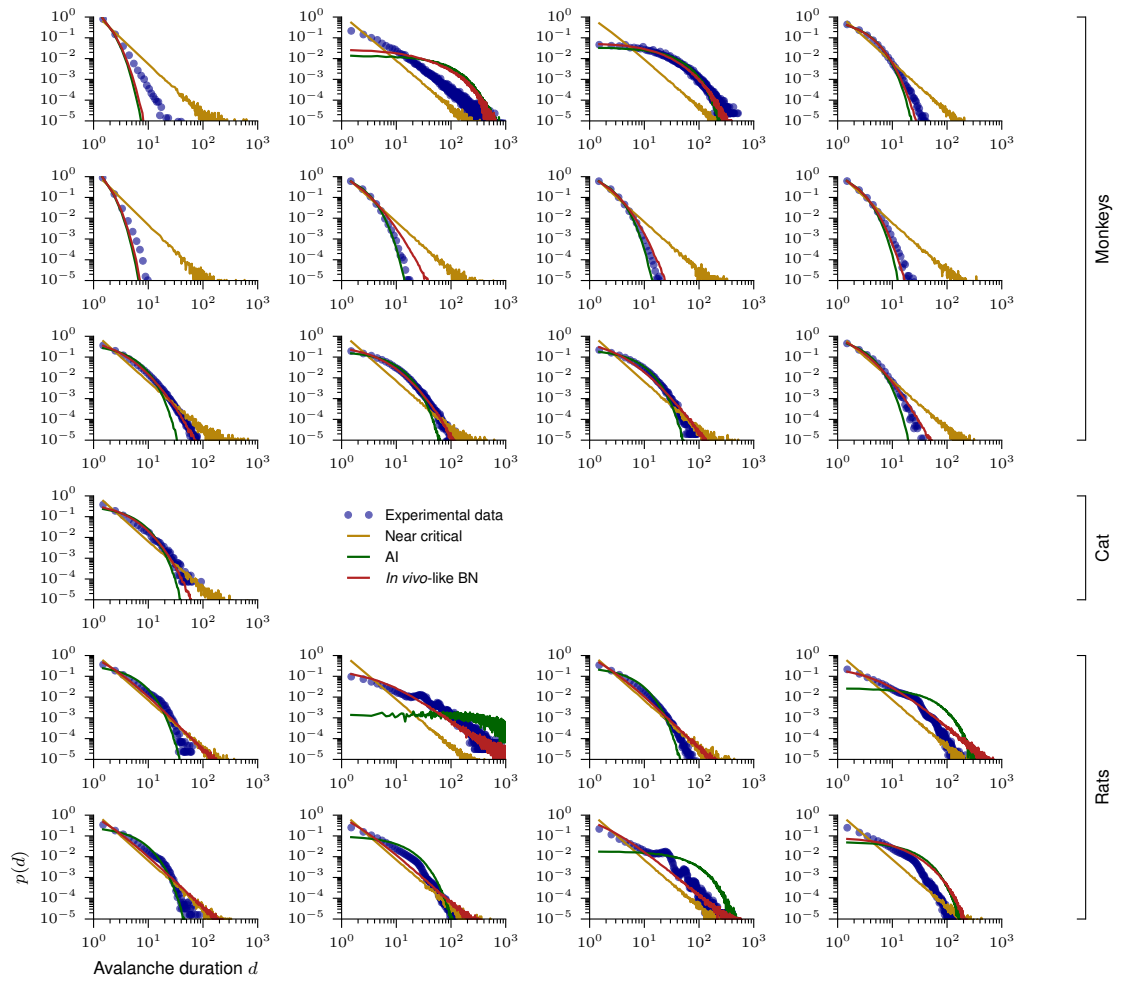

**FIGURE S8: Avalanche duration distribution for individual recording sessions.** Avalanche duration distributions are shown for every recording (blue) and for matched models, either AI (green), *in vivo*-like (red), or near critical (yellow).

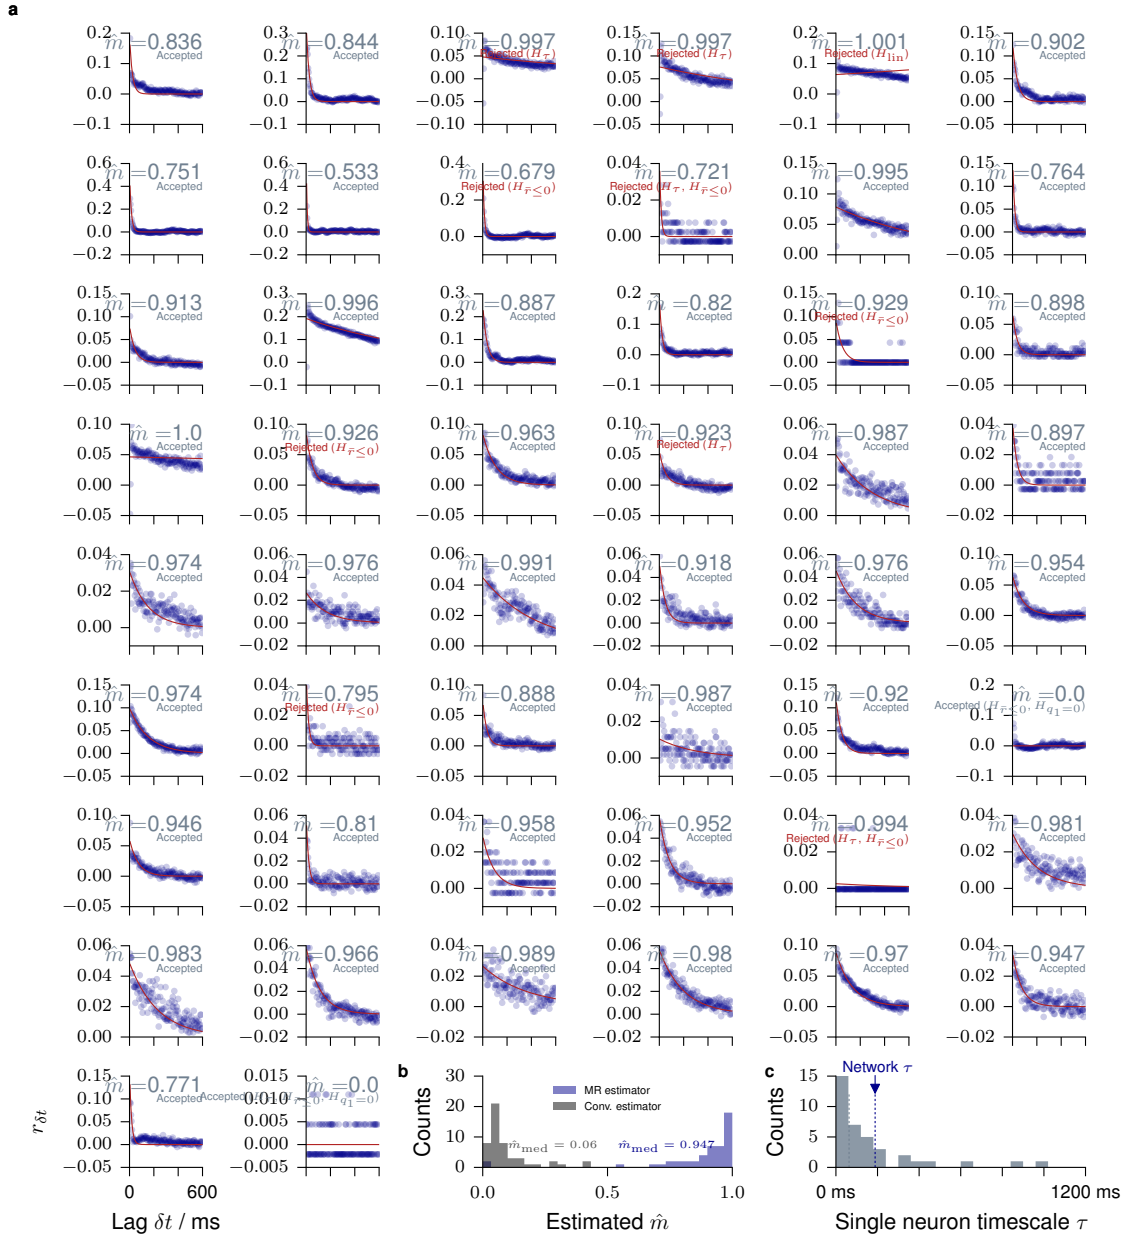

**FIGURE S9: MR estimation from single neuron activity (cat).** Modified from Wilting and Priesemann (2018). MR estimation is used to estimate  $\hat{m}$  from the activity  $a_t$  of a single units in cat visual cortex. **a.** Each panel shows MR estimation for one of the 50 recorded units. Autocorrelations decay rapidly in some units, but long-term correlations are present in the activity of most units. The consistency checks are detailed in Wilting and Priesemann (2018). **b.** Histogram of the single unit branching ratios  $\hat{m}$ , inferred with the conventional estimator and using MR estimation. The difference between these estimates demonstrates the subsampling bias of the conventional estimator, and how it is overcome by MR estimation. **c.** Histogram of single unit timescales with their median (gray dotted line) and the timescale of the dynamics of the whole network (blue dotted line).



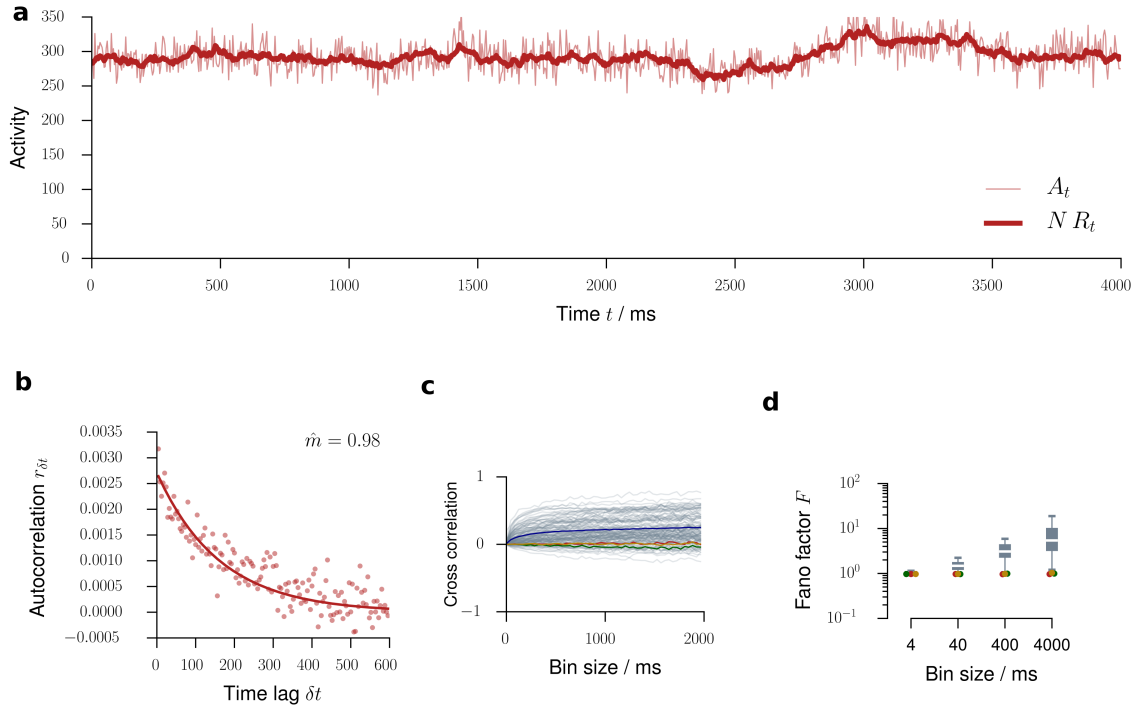

**FIGURE S10: Doubly stochastic model.** Instead of a branching model, we here matched a doubly stochastic process to the data. The rates evolved according to  $R_{t+1} = m R_t + h_t$  where  $h_t$  is drawn from a Poisson distribution. The actual activity is then drawn from a Poisson distribution according to  $A_t \sim \text{Poi}(N R_t)$ . Here, results for the experiment in cat visual cortex are shown. **a** Time evolution of  $R_t$  and  $A_t$ . As the activity is not fed back into the evolution of  $R_t$ , the second step effectively adds measurement noise to the underlying process. **b** The subsampled activity (50 out of 10,000, as in the branching models) shows the expected autocorrelation function. **c** Any of the doubly stochastic processes underestimated the spike count cross correlations. **d** Any of the doubly stochastic processes underestimated the single unit Fano factors.

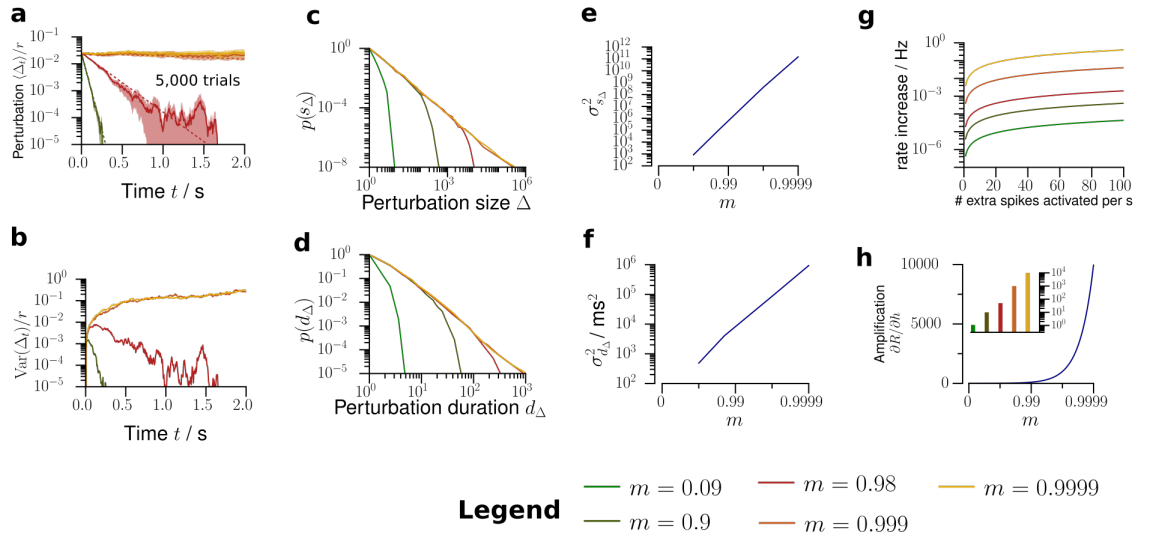

**FIGURE S11: Further predictions about network activity.** **a.** The model predicts that the perturbation decays exponentially with decay time  $\tau = -\Delta t / \log m$ . **b.** The variance across trials of the perturbed firing rate has a maximum, whose position depends on  $m$ . **c.** Depending on  $m$ , the model predicts the distributions for the total number of extra spikes  $s_\Delta$  generated by the network following a single extra spike. **d.** Likewise, the model predicts distributions of the duration  $d$  of these perturbations. **e.** Variance of the total perturbation size as a function of  $m$ . **f.** Variance of the total perturbation duration as a function of  $m$ . **g.** Increase of the network firing rate as a function of the rate of extra neuron activations for different  $m$ . **h.** Amplification (susceptibility)  $dr/dh$  of the network as a function of the branching ratio  $m$ .
